# Supplementary material for: Convergent degeneration of olfactory receptor gene repertoires in marine mammals
Source: PubMed Central journal article supplement (PMC6916060; doi:10.1186/s12864-019-6290-0), 2019-12-12

A

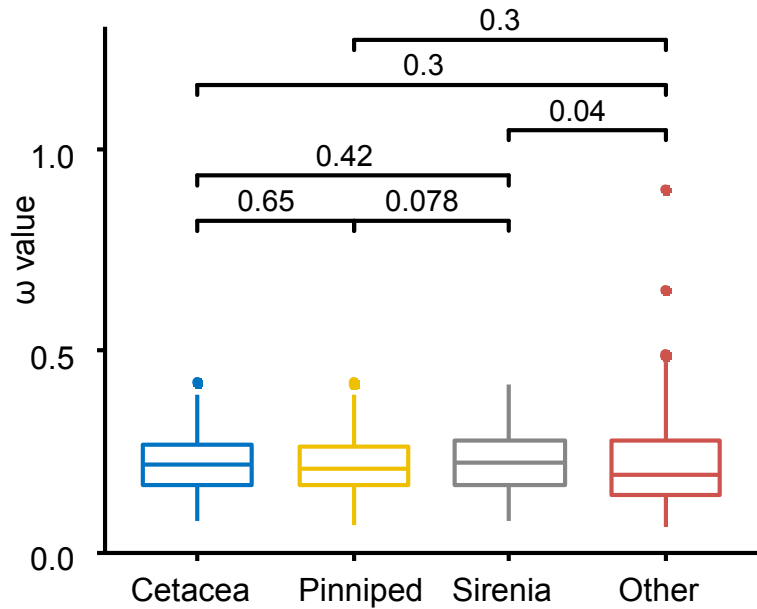

B

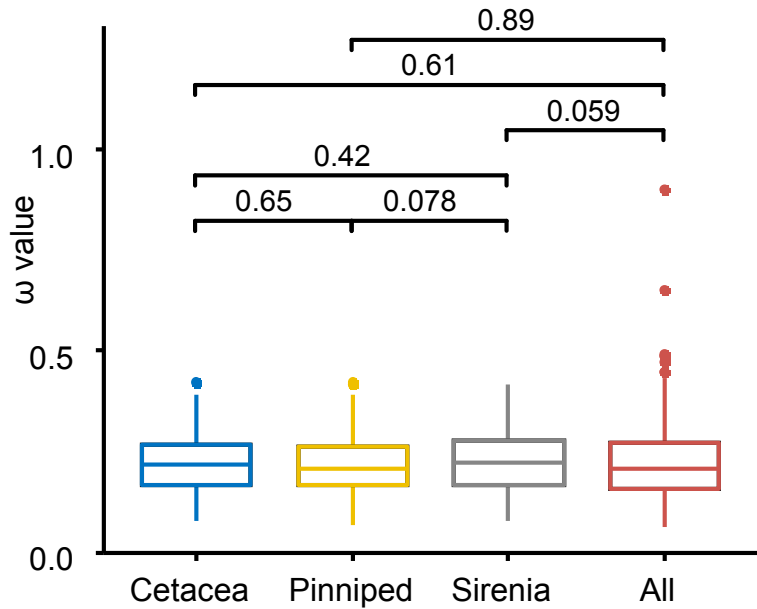

Supplement: 12864_2019_6290_MOESM1_ESM.pdf [file 12864_2019_6290_MOESM1_ESM.pdf]
